# Supplementary material
Source: publisher figshare collection journal article supplement (https://acs.figshare.com/ndownloader/files/6092811)
Supplement: Supplementary file 1 [file 6092811]

## SUPPORTING INFORMATION for Manuscript

### Efficient Low-Temperature H<sub>2</sub> Production from HCOOH/HCOO<sup>-</sup> by [Pd<sup>0</sup>@SiO<sub>2</sub>-Gallic-Acid] Nanohybrids: Catalysis and the Underlying Thermodynamics & Mechanism

Panagiota Stathi<sup>1</sup>, Maria Louloudi<sup>1</sup>, Yiannis Deligiannakis<sup>2\*</sup>

<sup>1</sup>Laboratory of Biomimetic Catalysis, Department of Chemistry, University of Ioannina, 45100, Panepistimioupoli, Ioannina, Greece.

<sup>2</sup>Laboratory of Physical Chemistry of Materials & Environment, Department of Physics, University of Ioannina, 45100, Panepistimioupoli, Ioannina, Greece.

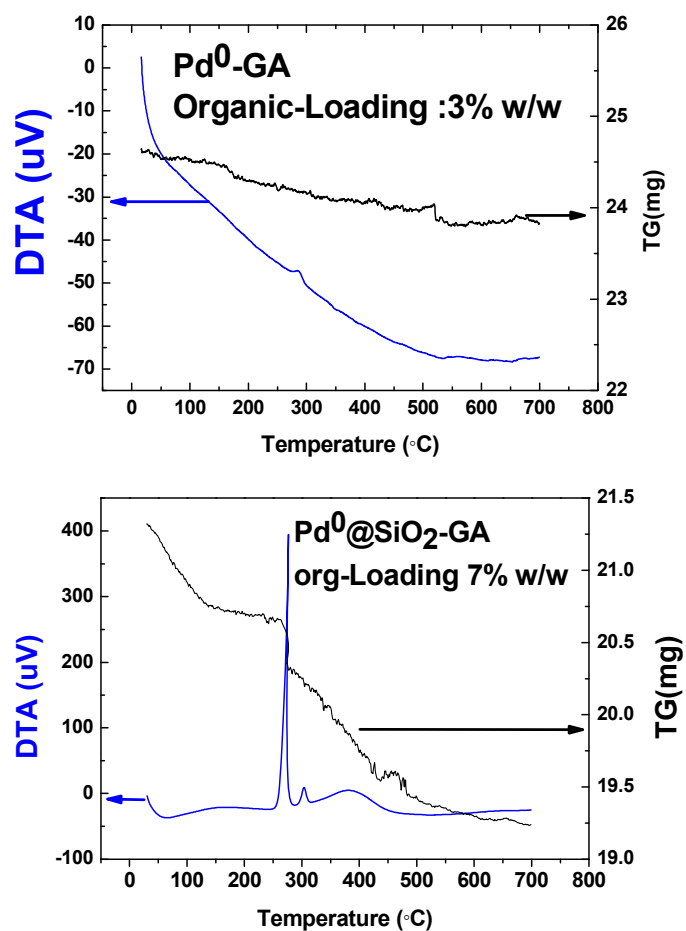

Figure S1. Thermographs of the Pd<sup>0</sup>-GA and Pd<sup>0</sup>@SiO<sub>2</sub>-GA materials

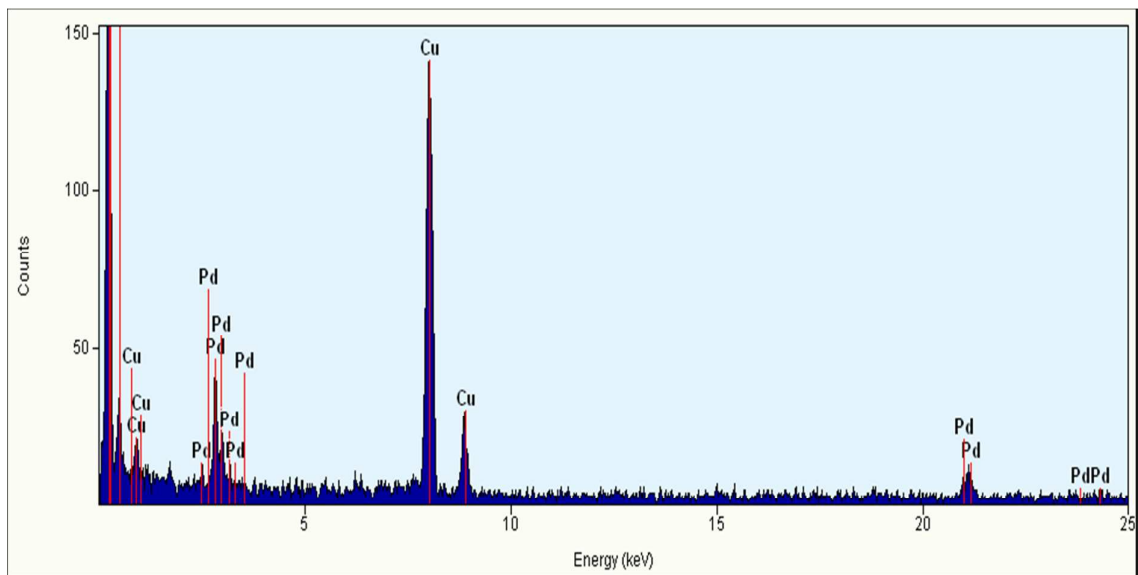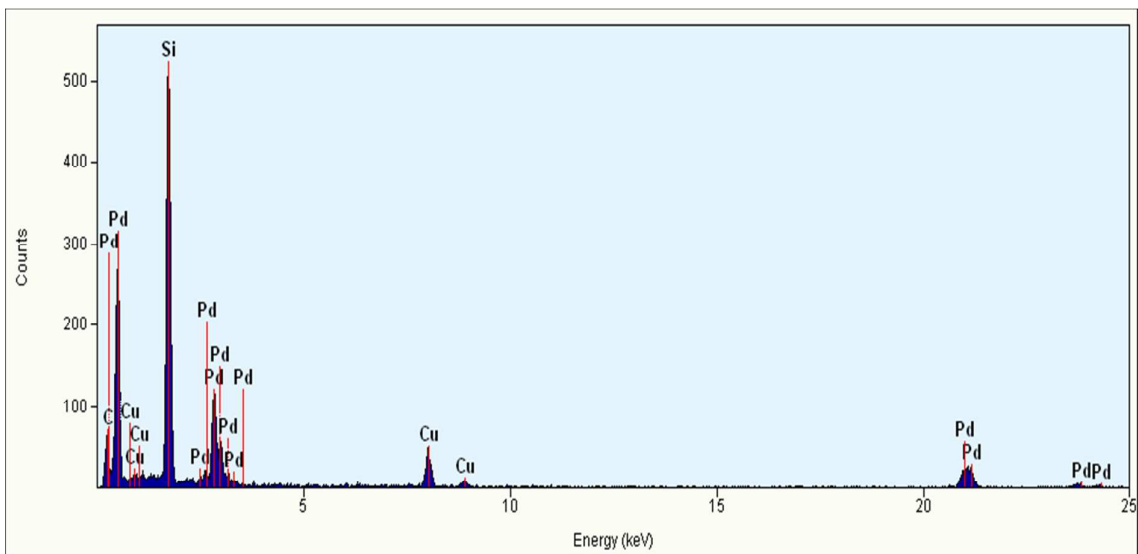

**Figure S2.** EDS spectra of the prepared nanocatalysts (A) Pd<sup>0</sup>-GA (top) (B) Pd<sup>0</sup>@SiO<sub>2</sub>-GA (bottom).

## XRD analysis of the particles after catalytic use

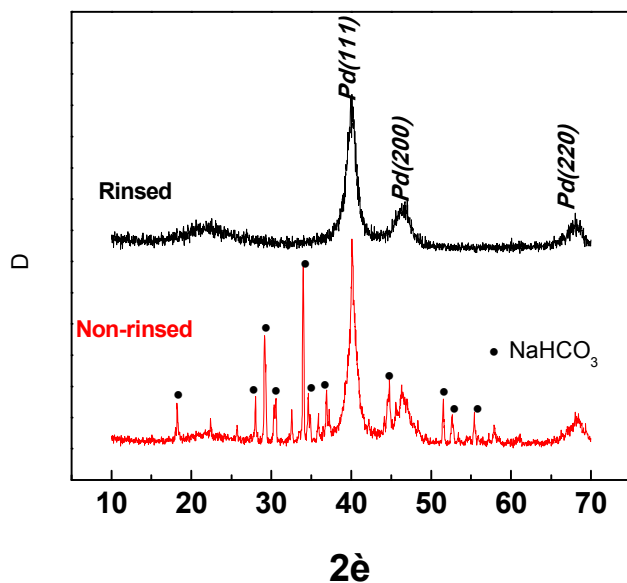

**Figure S3.** XRD patterns of Pd<sup>0</sup>@SiO<sub>2</sub>-GA after use in catalytic reaction (red line). Significant amounts of NaHCO<sub>3</sub> have been deposited on the particles as results of the catalytic cycle, see Scheme-2. These carbonates could be washed out by a simple rinsing with water (black line).

### Calculation of the Pd-atoms exposed on the particle surface

$$\text{particle surface} = 4\pi \left( \frac{d_{XRD}}{2} \right)^2$$

$$\text{particle volume} = \frac{4}{3}\pi \left( \frac{d_{XRD}}{2} \right)^3$$

$$\text{Pd mol per particle} = \frac{\text{particle volume}}{\text{Pd atomic volume}} * N_{avog}$$

$$\text{mass of NP} = \text{pd moles per particle} * \text{Pd atomic mass}$$

$$Pd\ NPs\ per\ mass\ of\ material = \frac{mass\ of\ the\ material}{mass\ of\ NP}$$

$$Pd\ mol\ exposed\ per\ NP = \frac{particle\ surface}{Pd\ atom\ surface} * N_{avog}$$

$$Pd\ mol\ exposed\ per\ mass\ of\ material = \frac{particle\ surface}{Pd\ atom\ surface} N_{avog} * \frac{mass\ of\ the\ material}{mass\ of\ the\ particle}$$

### Calculations of TONs and TOFs

$$TONs = \frac{mol\ of\ Gasses}{mol\ of\ Pd\ exposed} = \frac{V_{gasses}}{(aH_2+aCO_2)} \quad (s1)$$

$$TOF = \frac{TONs}{t} \quad (s2)$$

| Table S1. TONs and TOFs from catalytic results |      |                        |                     |      |                        |
|------------------------------------------------|------|------------------------|---------------------|------|------------------------|
| Pd <sup>0</sup> @SiO <sub>2</sub> -GA          |      |                        | Pd <sup>0</sup> -GA |      |                        |
| Temp.(°C)                                      | TONs | TOFs(h <sup>-1</sup> ) | Temp.(°C)           | TONs | TOFs(h <sup>-1</sup> ) |
| 60                                             | 874  | 777                    | 60                  | 227  | 130                    |
| 75                                             | 874  | 984                    | 80                  | 635  | 300                    |
| 80                                             | 874  | 1499                   | 90                  | 663  | 349                    |
| 90                                             | 874  | 2873                   |                     |      |                        |
|                                                |      |                        |                     |      |                        |
